# Supplementary material for: Effect of neutropenia on survival outcomes of patients with metastatic colorectal cancer receiving trifluridine/tipiracil plus bevacizumab
Source: PubMed Central journal article supplement — Oncol Lett. 2021 Sep 13;22(5):783. doi: 10.3892/ol.2021.13044 (PMC8456503; doi:10.3892/ol.2021.13044), 2021-09-13
Supplement: Supplementary_Data.pdf [file Supplementary_Data.pdf]

Table SI. Comparison of patient demographics and clinical characteristics between patients with and without grade 3 or 4 neutropenia within the first cycle of treatment.

| Characteristic                                         | Patients with grade 3 or 4 neutropenia (n=26) | Patients without grade 3 or 4 neutropenia (n=68) | P-value |
|--------------------------------------------------------|-----------------------------------------------|--------------------------------------------------|---------|
| Median age at enrollment, years (range)                | 61 (36-80)                                    | 61 (32-82)                                       |         |
| Sex                                                    |                                               |                                                  | 0.91    |
| Male                                                   | 10 (38.5)                                     | 27 (39.7)                                        |         |
| Female                                                 | 16 (61.5)                                     | 41 (60.3)                                        |         |
| ECOG PS                                                |                                               |                                                  | 0.91    |
| 0                                                      | 18 (69.2)                                     | 46 (67.6)                                        |         |
| 1                                                      | 6 (23.1)                                      | 18 (26.5)                                        |         |
| 2                                                      | 2 (7.7)                                       | 4 (5.9)                                          |         |
| Primary site                                           |                                               |                                                  | 0.26    |
| Right-sided colon                                      | 5 (19.2)                                      | 21 (31.0)                                        |         |
| Left-sided colon                                       | 21 (80.8)                                     | 47 (69.1)                                        |         |
| Metastatic site                                        |                                               |                                                  |         |
| Liver                                                  | 15 (57.7)                                     | 41 (60.3)                                        | 0.82    |
| Lung                                                   | 19 (73.1)                                     | 50 (73.5)                                        | 0.96    |
| Peritoneal                                             | 10 (38.5)                                     | 30 (44.1)                                        | 0.19    |
| Lymph node                                             | 11 (42.3)                                     | 35 (51.5)                                        | 0.43    |
| Other                                                  | 5 (19.2)                                      | 21 (30.9)                                        | 0.26    |
| RAS status in tissue                                   |                                               |                                                  | 0.13    |
| Wild-type                                              | 7 (26.9)                                      | 30 (44.1)                                        |         |
| Mutant                                                 | 19 (73.1)                                     | 38 (55.9)                                        |         |
| Time from the start of first-line chemotherapy, months |                                               |                                                  | 0.08    |
| <18                                                    | 10 (38.5)                                     | 12 (17.6)                                        |         |
| ≥18                                                    | 16 (61.5)                                     | 54 (79.4)                                        |         |
| Unknown                                                | 0 (0.0)                                       | 2 (3.0)                                          |         |
| Number of prior regimens                               |                                               |                                                  |         |
| 1                                                      | 0 (0.0)                                       | 0 (0.0)                                          |         |
| 2                                                      | 19 (73.1)                                     | 49 (72.1)                                        |         |
| 3                                                      | 7 (26.9)                                      | 15 (22.1)                                        |         |
| 4                                                      | 0 (0.0)                                       | 4 (5.9)                                          |         |
| Previous chemotherapy                                  |                                               |                                                  |         |
| Fluoropyrimidine                                       | 26 (100.0)                                    | 68 (100.0)                                       |         |
| Irinotecan                                             | 26 (100.0)                                    | 68 (100.0)                                       |         |
| Oxaliplatin                                            | 25 (96.2)                                     | 68 (100.0)                                       |         |
| Angiogenesis inhibitor                                 | 26 (100.0)                                    | 68 (100.0)                                       |         |
| Anti-EGFR antibodies                                   | 3 (11.5)                                      | 13 (19.1)                                        |         |
| Number of metastasis                                   |                                               |                                                  | 0.09    |
| 1                                                      | 5 (19.2)                                      | 5 (7.4)                                          |         |
| >1                                                     | 21 (80.8)                                     | 63 (92.6)                                        |         |

ECOG PS, Eastern Cooperative Oncology Group Performance Status; RAS, rat sarcoma viral oncogene homolog; EGFR, epidermal growth factor receptor.

Table SII. Comparison of incidence of adverse events between patients with and without grade 3 or 4 neutropenia within the first cycle of treatment.

| Adverse event, n (%) | Total number of patients (n=94) | Patients with grade 3 or 4 neutropenia (n=26) | Patients without grade 3 or 4 neutropenia (n=68) | P-value              |
|----------------------|---------------------------------|-----------------------------------------------|--------------------------------------------------|----------------------|
| Leucopenia           | 68 (72.3)                       | 25 (96.2)                                     | 33 (48.5)                                        | 0.00005 <sup>b</sup> |
| Anemia               | 45 (47.9)                       | 17 (65.4)                                     | 28 (41.2)                                        | 0.03560 <sup>a</sup> |
| Thrombocytopenia     | 18 (19.1)                       | 11 (42.3)                                     | 7 (10.3)                                         | 0.00040 <sup>b</sup> |
| Anorexia             | 4 (4.3)                         | 0 (0.0)                                       | 4 (5.9)                                          | 0.20600              |
| Vomiting             | 2 (2.1)                         | 0 (0.0)                                       | 2 (2.9)                                          | 0.37700              |
| Nausea               | 17 (18.1)                       | 1 (3.8)                                       | 16 (23.5)                                        | 0.02660 <sup>a</sup> |
| Diarrhea             | 7 (7.4)                         | 3 (11.5)                                      | 4 (5.9)                                          | 0.35000              |
| Febrile neutropenia  | 1 (1.1)                         | 0 (0.0)                                       | 1 (1.5)                                          | 0.53400              |
| Hypertension         | 12 (12.8)                       | 7 (27.0)                                      | 5 (7.4)                                          | 0.01100 <sup>a</sup> |
| Proteinuria          | 33 (35.1)                       | 10 (38.5)                                     | 23 (33.8)                                        | 0.67300              |

<sup>a</sup>P<0.05; <sup>b</sup>P<0.001.

Table SIII. Previous reports of clinical outcomes in patients with metastatic colorectal cancer treated with trifluridine/tipiracil monotherapy as a late-line treatment.

| Author, year (ref.)                | Number of patients | RR, % | DCR, % | PFS, months | OS, months | Grade 3 or 4 neutropenia, % |
|------------------------------------|--------------------|-------|--------|-------------|------------|-----------------------------|
| Yoshino <i>et al</i> , 2012 (21)   | 112                | 1.0   | 43.0   | 2.0         | 9.0        | 50.0                        |
| Mayer <i>et al</i> , 2016 (5)      | 534                | 1.6   | 44.0   | 2.0         | 7.1        | 38.0                        |
| Arita <i>et al</i> , 2016 (22)     | 43                 | 3.0   | 33.0   | 2.5         | 7.6        | 44.0                        |
| Masuishi <i>et al</i> , 2016 (23)  | 54                 | 0     | 39.0   | 2.1         | 6.5        | 37.0                        |
| Kotani <i>et al</i> , 2016 (24)    | 55                 | 3.7   | 37.0   | 2.0         | 5.3        | 41.8                        |
| Sueda <i>et al</i> , 2016 (25)     | 14                 | 0     | 28.4   | 2.1         | 6.3        | 14.3                        |
| Xu <i>et al</i> , 2018 (6)         | 271                | 1.1   | 44.1   | 2.0         | 7.8        | 33.2                        |
| Kwakman <i>et al</i> , 2018 (26)   | 136                | 2.0   | 28.0   | 2.1         | 5.4        | 32.0                        |
| Cremolini <i>et al</i> , 2018 (27) | 341                | 2.0   | 29.0   | 2.4         | 6.2        | 36.4                        |
| Moriwaki <i>et al</i> , 2018 (28)  | 327                | 1.0   | 29.6   | -           | 7.4        | 33.0                        |

RR, response rate; DCR, disease control rate; PFS, progression-free survival; OS, overall survival.
